# Supplementary material for: Gaseous and Particulate Pollution in the Wu-Chang-Shi Urban Agglomeration on the Northern Slope of Tianshan Mountains from 2017 to 2021
Source: MDPI journal article supplement (doi:10.3390/atmos14010091), 2022-12-31
Supplement: s1 [file s1]

Archive with 1 entries (1 files):
- atmosphere-2049977-supplementary.pdf
