# Supplementary material for: Gaseous and Particulate Pollution in the Wu-Chang-Shi Urban Agglomeration on the Northern Slope of Tianshan Mountains from 2017 to 2021
Source: MDPI journal article supplement (doi:10.3390/atmos14010091), 2022-12-31
Supplement: s1 [file s1 › atmosphere-2049977-supplementary.pdf]

## Supplementary material description

The supplementary material includes the data results plots of seasonal variations of gaseous pollutant and particulate matter concentrations in Shihezi and Urumqi in the Wu-Chang-Shi area and data results plots of the influence of meteorological factors on gaseous pollutant and particulate matter concentrations in Shihezi and Urumqi, Supplementary Figures S1-S4.

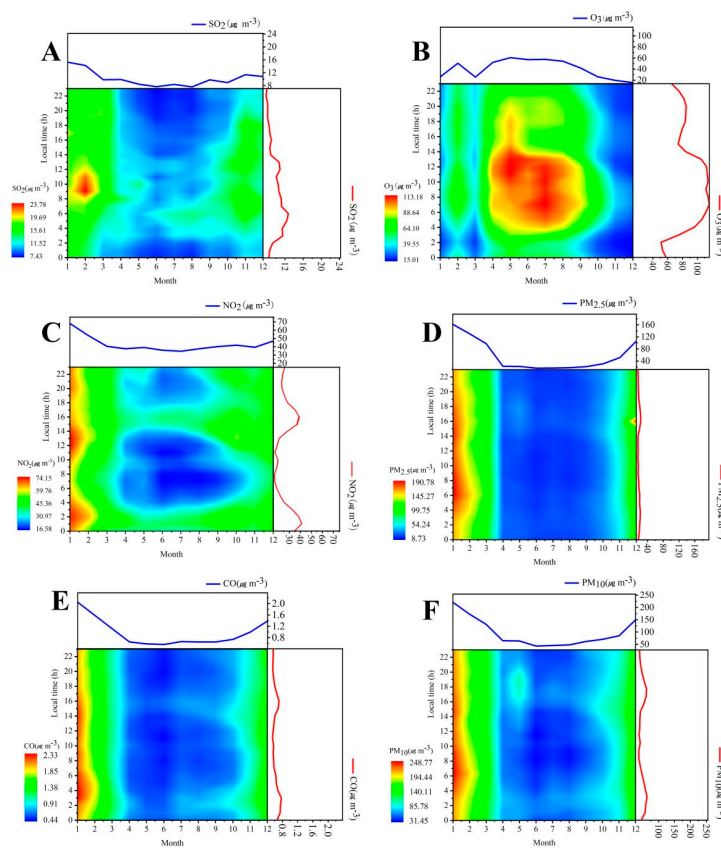

**Figure S1.** Shihezi time-dependent distribution of gas concentrations (a SO<sub>2</sub>, b O<sub>3</sub>, c NO<sub>2</sub> and e CO) and particulate matter (d PM<sub>2.5</sub> and f PM<sub>10</sub>) (filled colours).

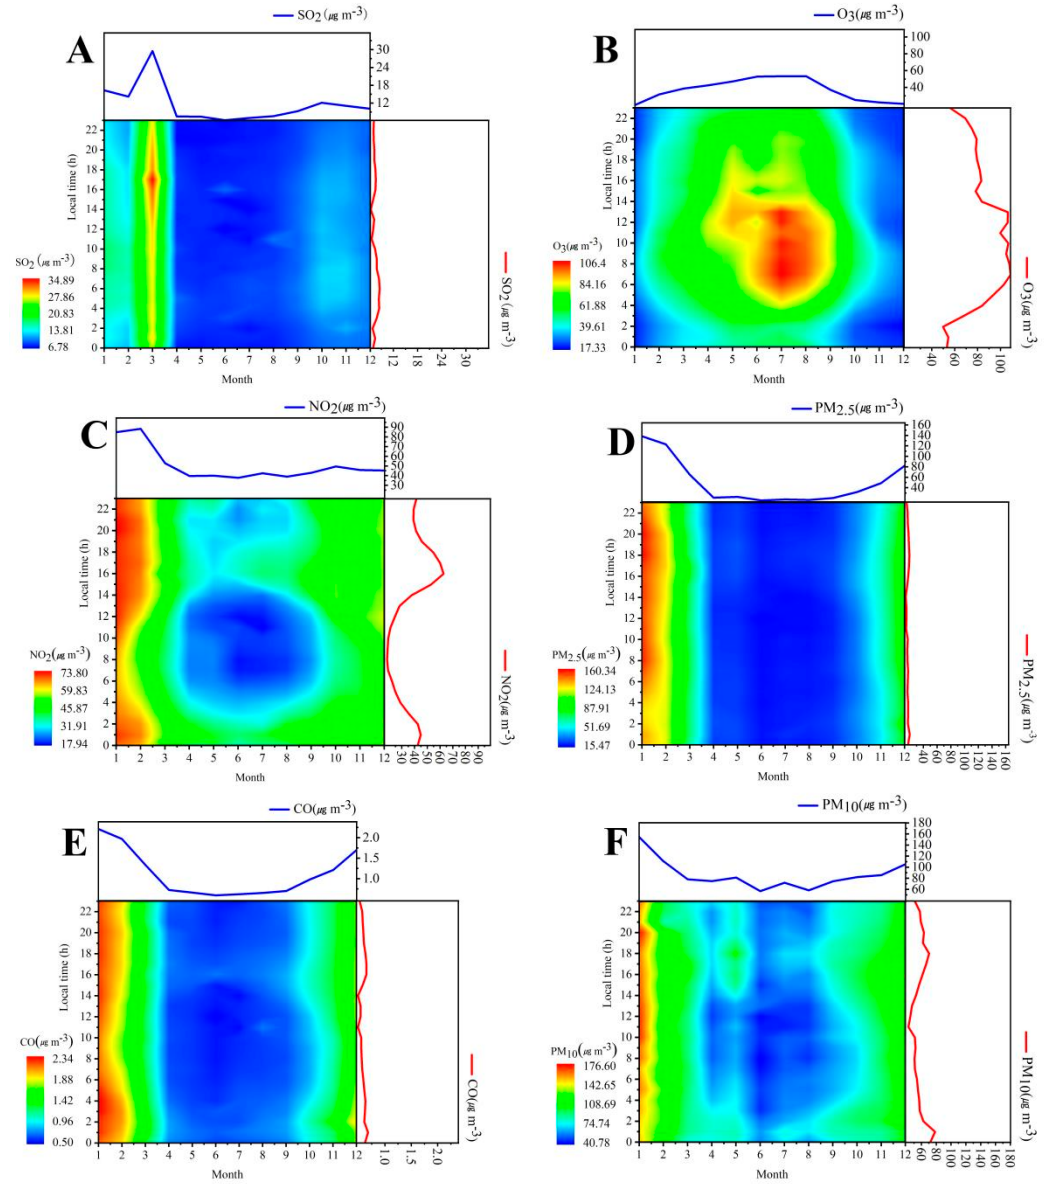

**Figure S2.** Urumqi time-dependent distribution of gas concentrations (**a**  $\text{SO}_2$ , **b**  $\text{O}_3$ , **c**  $\text{NO}_2$  and **e**  $\text{CO}$ ) and particulate matter (**d**  $\text{PM}_{2.5}$  and **f**  $\text{PM}_{10}$ ) (filled colours).

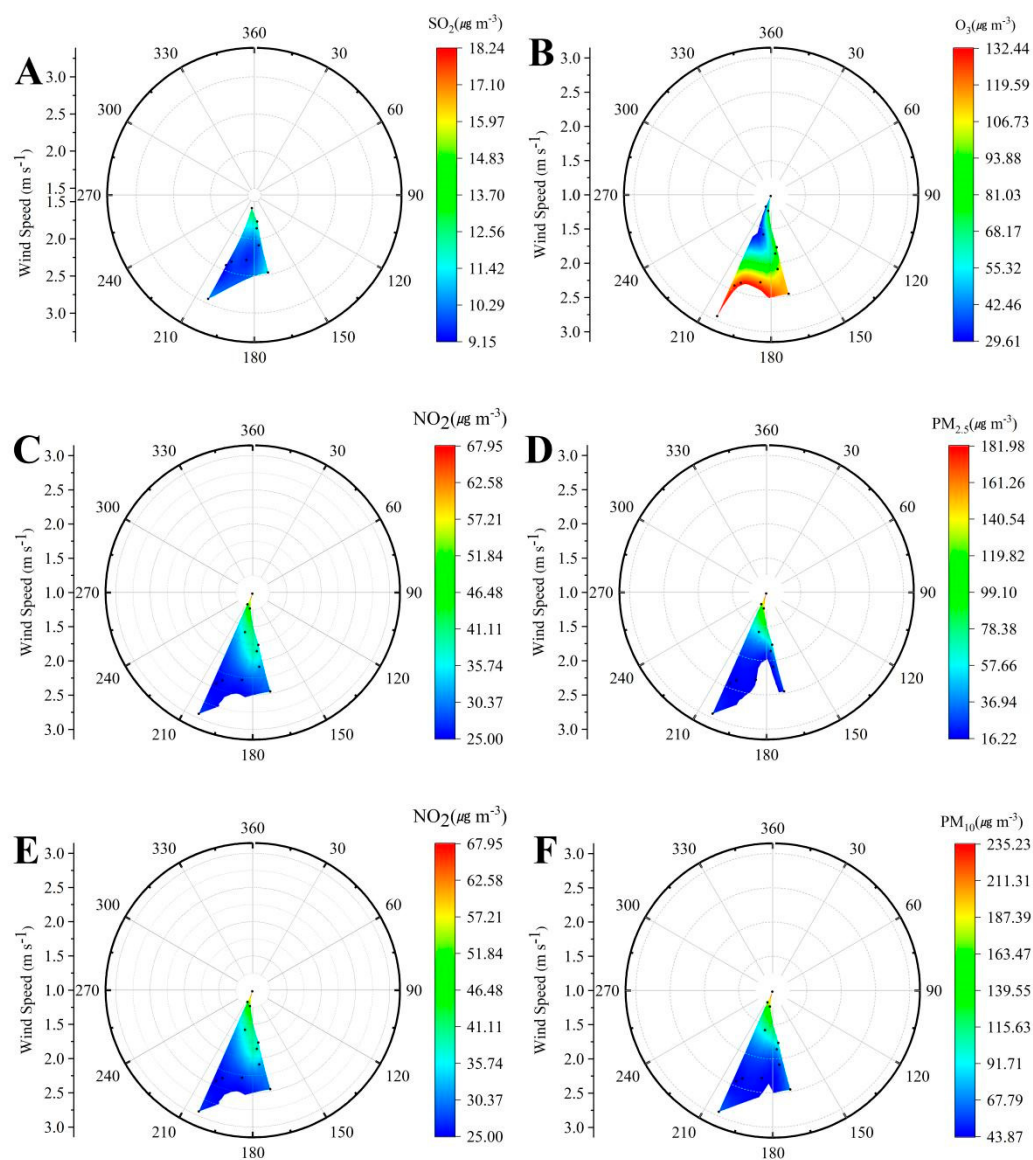

**Figure S3.** Polar plots of  $\text{SO}_2$ ,  $\text{NO}_2$ ,  $\text{CO}$ ,  $\text{O}_3$ ,  $\text{PM}_{2.5}$  and  $\text{PM}_{10}$  concentrations in the Shihezi. **a**  $\text{SO}_2$ . **b**  $\text{O}_3$ . **c**  $\text{NO}_2$ . **d**  $\text{PM}_{2.5}$ . **e**  $\text{CO}$ . **f**  $\text{PM}_{10}$ .

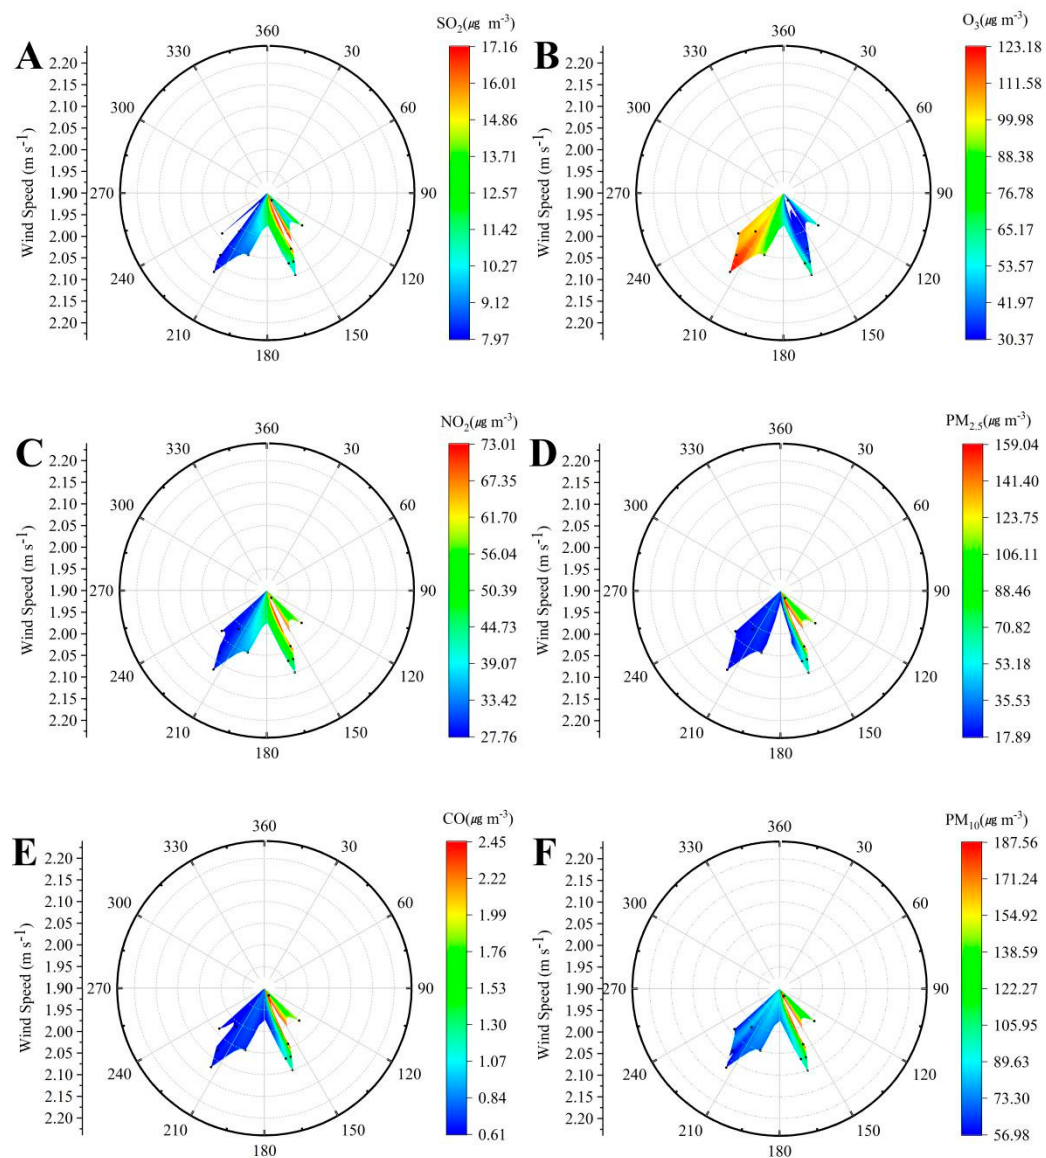

**Figure S4.** Polar plots of  $\text{SO}_2$ ,  $\text{NO}_2$ ,  $\text{CO}$ ,  $\text{O}_3$ ,  $\text{PM}_{2.5}$  and  $\text{PM}_{10}$  concentrations in the Urumqi. **a**  $\text{SO}_2$ . **b**  $\text{O}_3$ . **c**  $\text{NO}_2$ . **d**  $\text{PM}_{2.5}$ . **e**  $\text{CO}$ . **f**  $\text{PM}_{10}$ .
